# Supplementary material for: The Notch and TGF-β Signaling Pathways Contribute to the Aggressiveness of Clear Cell Renal Cell Carcinoma
Source: PubMed Central journal article supplement (PMC3149633; doi:10.1371/journal.pone.0023057), 2011-08-03
Supplement: pone.0023057.s004.pdf [file pone.0023057.s004.pdf]

**Table S2**

| <b>Parameters</b>                           | <b>Univariate Analysis</b> | <b>Multivariate Analysis</b> | <b>Hazard Ratio</b> | <b>Lower 0.95</b> | <b>Upper 0.05</b> |
|---------------------------------------------|----------------------------|------------------------------|---------------------|-------------------|-------------------|
| <b>TGF-<math>\beta</math> Pathway Score</b> | 0.00129                    | 0.00433                      | 4.036               | 1.548             | 10.527            |
| <b>Stage</b>                                | <2e-16                     | < 2e-16                      | 3.652               | 2.731             | 4.884             |
| <b>Grade</b>                                | 2.06E-05                   | 0.0489                       | 1.383               | 1.002             | 1.909             |
| <b>Performance Status</b>                   | 6.80E-07                   | 0.00524                      | 1.329               | 1.088             | 1.622             |
